# Supplementary material for: The role of miR-369-3p in proliferation and differentiation of preadipocytes in Aohan fine-wool sheep
Source: Copernicus journal article supplement (doi:10.5194/aab-66-93-2023), 2023-02-27
Supplement: Supplementary file 1 [file Table S1 Summary of differentially expressed miRNAs.xlsx]

## Sheet: Sheet1
miRNA	miR_seq	up/down	fold_change(Mth_12(mean)/Mth_2(mean))	log2(fold_change)	pvalue(t_test)	Mth_2(mean)	Mth_12(mean)
oar-miR-369-3p	AATAATACATGGTTGATCTTT	down	0.27	-1.91	0.014	465	123
bta-mir-664a-p3_1ss20CA	TTCGTTTACTCCCTAGCCTACA	up	1.92	0.94	2.88e-05	292	559
oar-miR-323a-3p_L+1	GCACATTACACGGTCGACCTCT	down	0.27	-1.89	0.00015	1198	322
oar-miR-3958-3p	AGATATTGCACGGTTGATCTCT	down	0.11	-3.13	0.000247	6438	736
oar-miR-329b-3p_1ss21TC	AACACACCTGGTTAACCTCTCT	down	0.23	-2.12	0.000376	2224	511
oar-miR-3957-3p_R-1	ACGCACAGCACCTCACTGAGC	down	0.17	-2.57	0.000383	214	36
chi-miR-542-5p	TCGGGGATCATCATGTCACGAGA	down	0.08	-3.58	0.000475	67	6
oar-miR-411b-5p	TGGTCGACCATAAAACGTACGT	down	0.18	-2.5	0.000666	57	10
chi-miR-424-3p	CAAAACGTGAGGCGCTGCTAT	down	0.38	-1.39	0.000831	2046	781
chi-miR-450-5p_R+2	TTTTGCGATGTGTTCCTAATAT	down	0.44	-1.17	0.00112	593	263
bta-miR-450a	TTTTGCGATGTGTTCCTAATAT	down	0.44	-1.17	0.00112	593	263
bta-miR-503-5p_R+3	TAGCAGCGGGAACAGTACTGCAG	down	0.2	-2.31	0.00149	110	22
chi-miR-363-3p	AATTGCACGGTATCCATCTGCG	down	0.3	-1.74	0.00171	1417	423
chi-miR-20b	CAAAGTGCTCACAGTGCAGGTAG	down	0.24	-2.09	0.00222	276	65
hsa-miR-1260a_L+1_1ss10TG	AATCCCACCGCTGCCACCA	up	3.04	1.6	0.00235	29	88
cgr-miR-1260_L+1_1	AATCCCACCGCTGCCACCA	up	3.04	1.6	0.00235	29	88
chi-miR-224-5p	CAAGTCACTAGTGGTTCCGTTT	down	0.56	-0.84	0.00242	2811	1565
chi-miR-1307-3p	ACTCGGCGTGGCGTCGGTCGTGG	up	1.34	0.42	0.00285	2364	3158
chi-miR-1249	ACGCCCTTCCCCCCCTTCTTCA	up	2.09	1.06	0.00308	654	1367
PC-3p-53184_33	GGGGTGGGGTCGGCGGGGGA	up	6.28	2.65	0.00322	3	21
chi-miR-1307-5p_R+1	TCGACCGGACCTCGACCG	up	1.73	0.79	0.00326	292	506
chi-miR-130b-3p_R-2	CAGTGCAATGATGAAAGGGC	down	-inf	-inf	0.00331	17	0
oar-miR-432_1ss23GT	TCTTGGAGTAGGTCATTGGGTGT	down	0.26	-1.93	0.00331	1978	520
chi-miR-1388-5p_R+1	AGGACTGTCCAACCTGAGAATG	up	2.2	1.14	0.00348	31	69
oar-miR-323c	CACAATACACGGTCGGCCTCT	down	0.31	-1.71	0.0035	743	228
chi-miR-151-3p	CTAGACTGAAGCTCCTTGAGG	down	0.77	-0.39	0.00366	4652	3561
chi-miR-18b-3p	TACTGCCCTAAATGCTCCTTCT	down	-inf	-inf	0.00387	6	0
PC-5p-45000_53	CCCGGTACTGAGCTGACCCGA	down	0.2	-2.33	0.00412	25	5
oar-miR-370-5p	CAGGTCACGTCTCTGCAGTTAC	down	-inf	-inf	0.00423	63	0
oar-miR-411a-5p	ATAGTAGACCGTATAGCGTACG	down	0.29	-1.77	0.00435	2399	705
oar-miR-25_L+1	CATTGCACTTGTCTCGGTCTGA	down	0.66	-0.59	0.00436	14070	9353
bta-miR-17-3p_R+3	ACTGCAGTGAAGGCACTTGTAGA	down	0.24	-2.09	0.00483	60	14
oar-miR-380-3p	TATGTAATGTGGTCCACGTCT	down	0.21	-2.28	0.00524	10559	2174
oar-miR-329a-3p	AACACACCTGGTTAACCTTTTT	down	-inf	-inf	0.00531	10	0
bta-miR-378_R+1	ACTGGACTTGGAGTCAGAAGGCT	down	0.83	-0.27	0.00535	44277	36626
chi-miR-324-5p_R-2	CGCATCCCCTAGGGCATTGGT	down	0.56	-0.84	0.00591	83	46
bta-miR-503-3p_1ss14TC	GGAGTATTGTTTCCGCTGCCCGG	down	0.21	-2.24	0.00622	59	12
bta-miR-378_R+1_1ss22CA	ACTGGACTTGGAGTCAGAAGGAT	down	0.8	-0.32	0.00623	4596	3689
oar-miR-433-3p	ATCATGATGGGCTCCTCGGTGT	down	0.33	-1.58	0.00625	2778	929
mmu-miR-3968_L-2_1ss14AT	AATCCCACTCCTGACACCA	up	3.5	1.81	0.00631	27	94
oar-miR-412-3p	TGGTCGACCAGTTGGAAAGTAAT	down	0.13	-2.94	0.00647	354	46
chi-miR-504_R+1	AGACCCTGGTCTGCACTCTGTC	up	1.79	0.84	0.00695	8382	15005
mml-miR-486-5p_R+2	TCCTGTACTGAGCTGCCCCGAGTT	up	2.29	1.2	0.00725	6827	15648
ssc-mir-4332-p3_1ss17CT_1	GGGGCCGGGGGTGGGGTC	up	2.77	1.47	0.00726	12	33
ssc-mir-4332-p3_1ss17CT_2	GGGGCCGGGGGTGGGGTCGGC	up	2.77	1.47	0.00726	12	33
ssc-mir-4332-p5_1ss17CT_2	GGGGCCGGGGGTGGGGTCGGC	up	2.77	1.47	0.00726	12	33
chi-let-7f-3p_1ss22CT	CTATACAATCTATTGCCTTCCT	down	0.39	-1.36	0.0073	62	24
chi-miR-483_L+1R-3	TCACTCCTCTCCTCCCGTCT	down	-inf	-inf	0.00734	24	0
PC-5p-25035_165	TTTAGCGCGCGCCTCTCAA	up	2.19	1.13	0.00734	19	42
chi-miR-125a-3p	ACAGGTGAGGTTCTTGGGAGC	down	0.63	-0.67	0.00748	62	39
chi-miR-532-5p	CATGCCTTGAGTGTAGGACCGT	down	0.61	-0.7	0.00776	14869	9124
oar-miR-1197-3p	TAGGACACATGGTCTACTTCT	down	0.22	-2.17	0.00782	24	5
cpo-miR-652-3p	AATGGCGCCACTAGGGTTGTGA	up	1.6	0.68	0.00864	626	1000
oar-miR-377-3p	ATCACACAAAGGCAACTTTCGT	down	-inf	-inf	0.0092	13	0
oan-miR-1386_1ss18AT	CTCCTGGCTGGCTCGCCT	up	6.06	2.6	0.00946	3	20
oar-miR-382-5p	GAAGTTGTTCGTGGTGGATTCG	down	0.22	-2.16	0.00955	1262	283
bta-miR-193a-5p	TGGGTCTTTGCGGGCGAGATGA	up	1.71	0.77	0.00959	2023	3452
chi-miR-361-5p	TTATCAGAATCTCCAGGGGTAC	down	0.65	-0.63	0.00972	2715	1758
oar-miR-412-5p_R+2	CTTCACCTGGTCCACTAGCTGT	down	0.19	-2.41	0.00974	46	9
chi-miR-424-5p	CAGCAGCAATTCATGTTTTGA	down	0.51	-0.97	0.00977	393	200
bta-miR-130b	CAGTGCAATGATGAAAGGGCAT	down	0.11	-3.23	0.0102	11	1
cgr-miR-130b-3p	CAGTGCAATGATGAAAGGGCAT	down	0.11	-3.23	0.0102	11	1
chi-miR-99b-3p_R+4	CAAGCTCGTGTCTGTGGGTCCGTT	down	0.47	-1.1	0.0106	29	13
oar-miR-665-5p_1ss22GT	AGGGGTCTTGGCCTCTGCCCAT	down	-inf	-inf	0.0107	15	0
chi-miR-296-3p_R-1	AGGGTTGGGCGGAGGCTTTCC	down	0.57	-0.82	0.0107	1601	910
bta-mir-2904-2-p3_2	CTCGGATAGCCGGTCCCCCGC	up	2.37	1.24	0.0107	4861	11514
bta-mir-2904-2-p3_3	TCCCCCGCCGTCCCCGCC	up	2.37	1.24	0.0107	4861	11514
bta-mir-2904-2-p3_1	CCGTCCCCGCCGGCGGGCC	up	2.37	1.24	0.0107	4861	11514
bta-mir-2904-2-p5_4	CCGTCCCCGCCGGCGGGCC	up	2.37	1.24	0.0107	4861	11514
PC-5p-15208_325	CGGGAGCCCCGGGGAGAGTTC	up	2.4	1.26	0.0108	124	298
chi-let-7i-3p	CTGCGCAAGCTACTGCCTTGCT	down	0.43	-1.21	0.0108	330	142
oar-miR-409-5p	AGGTTACCCGAGCAACTTTGCAT	down	0.16	-2.68	0.011	5404	843
oar-miR-127_L-1	TCGGATCCGTCTGAGCTTGGCT	down	0.32	-1.66	0.0116	163803	51729
ssc-mir-4332-p3_1ss19TG	TCGCGGGGGTGGGCGGGCG	up	2.33	1.22	0.0118	9	21
mmu-miR-6239_R-2_1ss6TG	TAGCGGTGGATCACTCGG	up	5.75	2.52	0.0119	4	22
ssc-mir-4332-p3_1ss4TG	GGGGGTCGCGGGGGTGGGC	up	3.83	1.94	0.012	19	73
oar-miR-379-5p_R-1	TGGTAGACTATGGAACGTAGG	down	0.42	-1.24	0.012	1554	658
mml-miR-543-5p_L-1	AAGTTGCCCGTGTCTTTTTCG	down	0.15	-2.76	0.0122	38	6
chi-miR-500-5p	TAATCCTTGCTACCTGGGTGAGA	down	0.37	-1.45	0.0123	1235	453
mmu-miR-6238_L-1R-3_1ss12TC	TATTAGTCAGCGGAGGAA	up	2.5	1.32	0.0124	13	33
ssc-mir-4332-p3	GTCGCGGGGGTGGGCGGGC	up	3.12	1.64	0.0127	8	24
hsa-miR-1260a_L+2_1ss11TG_1	GAATCCCACCGCTGCCACCA	up	8.09	3.02	0.0127	5	37
hsa-miR-1260a_L+2_1ss11TG_2	TCATCCCACCGCTGCCACCA	up	8.09	3.02	0.0127	5	37
cgr-miR-1260_L+2	GAATCCCACCGCTGCCACCA	up	8.09	3.02	0.0127	5	37
bta-miR-2285n_R-1	AAAAACCCGAATGAACTTTTG	down	-inf	-inf	0.0127	8	0
oar-miR-487a-5p	GTGGCTATCCCTGCTGTGTTCG	down	0.02	-5.36	0.0133	90	2
PC-5p-11164_455	ACGCGAGCCGGGCCCTTCC	up	3.38	1.76	0.0134	70	238
bta-miR-365-5p_R+1	AGGGACTTTTGGGGGCAGATGTGT	up	2.43	1.28	0.0137	71	172
PC-3p-54024_32	TTGCTGCGGGTGTCAGGAAGA	down	0.14	-2.82	0.0138	17	2
chi-miR-2483-5p_L+2R-2	TCCGTCAACCATCCAGCTGTTT	down	-inf	-inf	0.0142	6	0
mml-miR-450a-1-3p_2ss8AG21GA	ATTGGGAGCATTTTGCATGTAT	down	-inf	-inf	0.0143	8	0
oar-miR-495-5p_L-1	GAAGTCGCCCATGTTCTTTTCG	down	0.23	-2.09	0.0144	236	55
oar-miR-493-5p	TTGTACATGGTAGGCTTTCATT	down	0.21	-2.27	0.0144	8667	1803
bta-mir-2887-1-p3	TGCGGAGAGCCCTTCGTCCCGGGAC	up	2.43	1.28	0.0147	2631	6396
PC-3p-26999_147	GCCTCAGCCACACCCCTCACA	up	2.29	1.2	0.0149	39	88
chi-miR-23b-5p	TGGGTTCCTGGCATGCTGATTT	up	2.28	1.19	0.015	87	199
oar-miR-299-5p	TGGTTTACCGTCCCACATACAT	down	0.08	-3.69	0.0151	5140	397
hsa-mir-3159-p5_1ss2AG	CGCGCCTGTAATCCCAGC	up	3.31	1.73	0.0162	15	51
oar-miR-3955-5p	TTTGATGGCTGATCCTCTCACT	down	0.35	-1.5	0.0164	86	30
PC-5p-2658_1454	AGAGGGACGGCCGGGGGC	up	3.28	1.71	0.0165	164	539
oar-miR-3959-3p	TGTATGTCAACTGATCCACAGT	down	-inf	-inf	0.0168	13	0
oar-miR-3959-5p	GGTTGATCAGAGAACATACATT	down	0.41	-1.28	0.017	549	226
oar-miR-495-3p	AAACAAACATGGTGCACTTCTT	down	0.15	-2.76	0.0172	778	115
hsa-miR-7977_1ss6AG	TTCCCGGCCAACGCACCA	up	3.37	1.75	0.0177	418	1410
cja-mir-9984-2-p5_1ss17GC_2	CGGCGGCGGCGGCGCGCGC	up	inf	inf	0.0178	0	4
cgr-miR-1260	ATCCCACCGCTGCCACCA	up	2.15	1.11	0.0179	1992	4286
oar-miR-181a	AACATTCAACGCTGTCGGTGAGT	down	0.6	-0.74	0.0179	21364	12748
ssc-mir-4332-p3_1ss12CT	CGGGGGTGGGGTCGGCGGGGG	up	3.74	1.9	0.0183	6	23
oar-miR-381-3p_L-1R+2	TATACAAGGGCAAGCTCTCTGT	down	0.07	-3.94	0.0185	8638	562
bta-miR-149-5p	TCTGGCTCCGTGTCTTCACTCCC	down	0.82	-0.28	0.0188	2974	2447
PC-5p-26245_154	CGGCGGGCCCGGCCGTGC	up	2.68	1.42	0.0189	17	45
oar-miR-29a_R+1	TAGCACCATCTGAAATCGGTTA	up	2.35	1.23	0.019	3600	8469
ssc-mir-4332-p5_1ss12CT	CGGGGGTGGGGTCGGCGGGG	up	3.28	1.72	0.0195	12	39
chi-miR-130a-3p_R+1	CAGTGCAATGTTAAAAGGGCAT	down	0.34	-1.57	0.0197	216	73
PC-3p-27226_145	CCGCTAAGGAGTGTGTAAC	up	2.49	1.31	0.0203	74	185
hsa-mir-3195-p3_1ss3CG	CGGCGCGCCGGGCCCGGG	up	2.87	1.52	0.0205	37	106
oar-miR-410-3p	AATATAACACAGATGGCCTGT	down	0.1	-3.28	0.0209	1902	196
bta-miR-139	TCTACAGTGCACGTGTCTCCAGT	down	0.92	-0.13	0.021	4124	3776
cgr-miR-139-5p_R+1	TCTACAGTGCACGTGTCTCCAGT	down	0.92	-0.13	0.021	4124	3776
mmu-miR-5126_L-1R-3_1ss18CT	CGGGCGGGGCCGGGGGTG	up	3.78	1.92	0.0216	10	37
bta-miR-92b_L-1R+1	ATTGCACTCGTCCCGGCCTCCT	up	3.96	1.99	0.0218	3	10
PC-5p-66762_15	TCACGCCATCTCTGAGGGGCT	down	0.17	-2.58	0.0222	11	2
chi-miR-151-5p	TCGAGGAGCTCACAGTCTAGT	down	0.8	-0.32	0.0224	25110	20084
bta-mir-2887-1-p5	CCGGGGTCCGGTGCGGAGAGC	up	2.1	1.07	0.0227	2501	5258
PC-3p-39214_74	TTCACTTGCTCATCGTGTCTGAC	up	1.61	0.68	0.0228	24	39
mmu-miR-5126_L-4_1ss18CT	GCGGGGCCGGGGGTGGGG	up	4.13	2.05	0.0233	8	32
ssc-miR-7134-3p_1ss7AC	ATGCGGCACCTGCGGATACGG	up	1.98	0.98	0.0234	748	1480
cgr-miR-300_R-2	TATGCAAGGGCAAGCTCTCT	down	0.2	-2.33	0.0236	111	22
ssc-mir-1285-p5	CGCGCCTGTGAATAGCCACTGTAC	up	3.04	1.6	0.0243	1989	6049
chi-miR-186-5p	CAAAGAATTCTCCTTTTGGGCT	down	0.55	-0.85	0.0246	6063	3353
bta-mir-2904-2-p5_1ss5TC	CGGTCGGCCTCGGATAGC	up	2.43	1.28	0.0247	7857	19077
ssc-mir-4332-p5_1ss17CT_3	GGGGCCGGGGGTGGGGTCGGCG	up	4.28	2.1	0.0247	4	19
ssc-mir-4332-p5_1ss17CT_1	GGGGCCGGGGGTGGGGTCG	up	4.28	2.1	0.0247	4	19
chi-miR-222-3p_R+1	AGCTACATCTGGCTACTGGGTCTCT	up	1.53	0.62	0.0249	548	840
oan-mir-150-p5_1ss4CT	GCCTCTCGGCGCCCCCTC	up	2.43	1.28	0.0257	131	318
bta-miR-486	TCCTGTACTGAGCTGCCCCGAG	up	2.04	1.03	0.0258	320238	653317
chi-miR-193b-5p	CGGGGTTTTGAGGGCGAGATGA	up	1.69	0.76	0.0262	547	926
ppy-mir-1268-p5_1ss9GA_2	GCGCCTGTAGTCCCAGCTA	up	3.02	1.59	0.0263	21	63
ppy-mir-1268-p5_1ss9GA_1	GCGCCTGTAGTCCCAGCT	up	3.02	1.59	0.0263	21	63
oan-miR-218-3p_R+1_1ss12TC	AAACATGGTTCCGTCAAGCAC	up	3.47	1.8	0.0265	3	11
oar-miR-496-3p_R+2	TGAGTATTACATGGCCAATCTCT	down	0.3	-1.74	0.0267	17	5
bta-miR-935_L-1	CAGTTACCGCTTCCGCTACCGC	down	0.53	-0.92	0.0268	118	62
chi-miR-197-3p	TTCACCACCTTCTCCACCCAGC	up	1.62	0.69	0.0272	10252	16571
PC-5p-6725_735	TCCCTGTGGTCTAGTGGTTAGGAT	up	2.32	1.22	0.0276	155	361
chi-miR-15b-5p	TAGCAGCACATCATGGTTTACA	down	0.63	-0.67	0.0278	1997	1253
chi-miR-145-5p	GTCCAGTTTTCCCAGGAATCCCT	down	0.63	-0.68	0.028	23689	14820
mmu-miR-3968_L-1_1ss14AT	GAATCCCACTCCTGACACCA	up	5.96	2.58	0.0281	1	8
chi-miR-767	TGCACCATGGTTGTCTGAGCAT	down	0.33	-1.61	0.0286	118	39
bta-miR-193a-5p_R-3	TGGGTCTTTGCGGGCGAGA	up	1.57	0.65	0.0289	57	89
oar-miR-382-3p_R+1	AATCATTCACGGACAACACTTT	down	0.46	-1.12	0.0291	127	59
hsa-miR-3195_L+3R-1	CGGCGCGCCGGGCCCGGGT	up	3.28	1.71	0.03	43	141
PC-3p-24545_170	GGAGTATTGTTTCCGCTGCCCGGT	down	0.38	-1.4	0.0304	51	19
lla-miR-181a-3p	ACCATCGACCGTTGATTGTACC	down	0.65	-0.63	0.0313	1101	714
chi-miR-193b-3p	AACTGGCCCACAAAGTCCCGCT	up	1.47	0.55	0.032	32797	48099
hsa-miR-1260a_R+2_1ss9TG_2	ATCCCACCGCTGCCACCAAG	up	1.93	0.95	0.0323	13	24
hsa-miR-4454_L+1_1ss3GA	CGAATCCGAGTCACGGCACCA	up	2.4	1.27	0.0325	4	9
cgr-miR-210-5p	AGCCACTGCCCACCGCACACTG	up	1.73	0.79	0.0325	13	22
PC-5p-12180_416	TCTCCCCCCGGCCGCCCCACC	up	3.08	1.62	0.0337	139	427
oan-miR-1386_L+1_1	ACTCCTGGCTGGCTCGCCA	up	8.35	3.06	0.0343	9	72
oan-miR-1386_L+1_2	CCTCCTGGCTGGCTCGCCA	up	8.35	3.06	0.0343	9	72
oan-miR-1386_L+1_3	TCTCCTGGCTGGCTCGCCA	up	8.35	3.06	0.0343	9	72
PC-3p-27465_143	AAAACCCGAACGAGCTCTTTGG	down	0.29	-1.77	0.0346	16	5
bta-miR-484	TCAGGCTCAGTCCCCTCCCGAT	down	0.62	-0.69	0.0354	6626	4118
oar-miR-487b-5p_L-1R+1	GTGGTTATCCCTGTCCTGTTCG	down	0.04	-4.62	0.0355	50	2
oar-miR-376e-3p	AACATAGAGGAAAATCCACATT	down	0.33	-1.61	0.0357	43	14
hsa-miR-4443_L+1	CTTGGAGGCGTGGGTTTT	down	0.2	-2.35	0.0357	19	4
mmu-miR-5126_R-3_1ss18CT	GCGGGCGGGGCCGGGGGTG	up	11.55	3.53	0.0358	1	8
hsa-miR-4492_L+1	CGGGGCTGGGCGCGCGCC	up	3.32	1.73	0.036	60	199
mml-miR-452-3p_L+2R-2	TCAGTCTCATCTGCAAAGAAGT	down	0.2	-2.32	0.0364	14	3
chi-miR-378-5p	CTCCTGACTCCAGGTCCTGTGT	down	0.65	-0.63	0.037	25846	16679
PC-5p-35174_92	CCGCGCCGCCCCGCCGTCG	up	2.87	1.52	0.0371	17	48
hsa-miR-10400-5p_R-3_1ss12GA	CGGCGGCGGCGACTCTGG	up	2.58	1.37	0.0371	33	85
hsa-miR-4508_R+1	GCGGGGCTGGGCGCGCGC	up	2.44	1.29	0.0372	21	51
oar-miR-3958-5p	AGGTTGTCCGTGATGTATTTGC	down	-inf	-inf	0.0373	13	0
PC-3p-34333_97	ATTTGGTGTATGTGCTTG	up	3.1	1.63	0.0377	4	13
cja-mir-9984-2-p5_1ss2GT	GTCGGCGGCGGCGGCGCG	up	3.19	1.67	0.038	4	11
chi-let-7e-5p	TGAGGTAGGAGGTTGTATAGTT	down	0.59	-0.75	0.038	1977	1175
chi-miR-3431-5p	CCTCAGTCAGCCTTGTGGATGT	down	0.56	-0.85	0.0386	4190	2330
chi-miR-656	AATATTATACAGTCAACCTCT	down	-inf	-inf	0.0388	13	0
PC-5p-37989_79	GCCGCCCCCGGGGAGCCCG	up	2.28	1.19	0.039	12	27
bta-mir-12034-p3_1ss2TG	CGCCCCCGGGGAGCCCGGC	up	2.08	1.06	0.0391	24	49
bta-mir-2904-2-p5_1	CCCCCGCCGTCCCCGCCGG	up	2.69	1.43	0.0398	12	31
bta-mir-2904-2-p5_6	CGGTCCCCCGCCGTCCCCGCC	up	2.69	1.43	0.0398	12	31
bta-mir-2904-2-p5_3	CCCGCCGTCCCCGCCGGC	up	2.69	1.43	0.0398	12	31
bta-mir-2904-2-p5_7	GTCCCCCGCCGTCCCCGCC	up	2.69	1.43	0.0398	12	31
bta-mir-2904-2-p5_5	CGCCGTCCCCGCCGGCGGG	up	2.69	1.43	0.0398	12	31
bta-mir-2904-2-p5_2	CCCCCGCCGTCCCCGCCGGC	up	2.69	1.43	0.0398	12	31
oar-miR-99a_R+1	AACCCGTAGATCCGATCTTGT	down	0.57	-0.82	0.0399	69839	39688
PC-3p-23974_176	CCCCCTCCCGGCGCTCCCC	up	2.54	1.34	0.0399	18	44
mmu-miR-5126_R-4_1ss18CT	GCGGGCGGGGCCGGGGGT	up	3.53	1.82	0.04	6	23
bta-miR-2284x_R+1	TGAAAAGTTCGTTCGGGTTTTT	down	0.7	-0.52	0.0404	394	274
bta-miR-2478_L-2	ATCCCACTTCTGACACCA	up	3.41	1.77	0.0404	2994	10197
chi-miR-421-3p	ATCAACAGACATTAATTGGGCGC	down	0.23	-2.09	0.0406	50	12
PC-3p-15329_321	CTCCACCCGCCCTCCCTCC	up	3.72	1.89	0.0406	25	95
chi-miR-28-5p	AAGGAGCTCACAGTCTATTGA	down	0.83	-0.27	0.0409	1322	1094
oar-miR-494-3p	TGAAACATACACGGGAAACCTCT	down	0.17	-2.55	0.0424	3462	590
chi-miR-214-5p	TGCCTGTCTACACTTGCTGTGC	down	0.51	-0.97	0.0426	150	77
bta-miR-452_L+3R-3	AACTGTTTGCAGAGGAAACTGA	down	0.4	-1.32	0.043	99	40
ptr-miR-877_R+3	GTAGAGGAGATGGCGCAGGGGACAT	down	-inf	-inf	0.0437	5	0
PC-3p-27417_143	GCCTGTCTGAGTGTCGCT	up	3.08	1.62	0.0439	13	41
ssc-mir-1285-p3_1ss15CT	ACATAGCGAGACCCTGTCTCTT	up	1.52	0.6	0.0441	5081	7715
ssc-mir-4332-p5_1ss12CA	CCGCCGGGCGCATTTCCACC	up	2.19	1.13	0.0442	491	1074
PC-3p-14741_337	CCACCGCTCTCCACCCCCACC	up	2.88	1.53	0.0445	270	778
mmu-mir-6236-p5_10	TGAAAATGGATGGCGCTGG	up	2.12	1.08	0.0448	72	153
mmu-mir-6236-p5_9	GAATCAACTAGCCCTGAAA	up	2.12	1.08	0.0448	72	153
mmu-mir-6236-p5_1	AAAATGGATGGCGCTGGAGC	up	2.12	1.08	0.0448	72	153
mmu-mir-6236-p5_6	CAACTCACCTGCCGAATCAACTAGC	up	2.12	1.08	0.0448	72	153
mmu-mir-6236-p3_1	AAAATGGATGGCGCTGGAGC	up	2.12	1.08	0.0448	72	153
mmu-mir-6236-p5_8	CTGAAAATGGATGGCGCTGGAG	up	2.12	1.08	0.0448	72	153
mmu-mir-6236-p5_7	CCTGAAAATGGATGGCGCTGGA	up	2.12	1.08	0.0448	72	153
mmu-mir-6236-p5_3	AATCAACTAGCCCTGAAA	up	2.12	1.08	0.0448	72	153
mmu-mir-6236-p5_2	AAATGGATGGCGCTGGAG	up	2.12	1.08	0.0448	72	153
mmu-mir-6236-p5_5	CAACTCACCTGCCGAATCAAC	up	2.12	1.08	0.0448	72	153
mmu-mir-6236-p5_4	AATCAACTAGCCCTGAAAA	up	2.12	1.08	0.0448	72	153
oar-miR-369-5p	AGATCGACCGTGTTATATTCG	down	0.14	-2.8	0.045	381	55
bta-mir-7857-1-p3_1ss1TC	CTTGTTCTCCAACCTGGCTCTTT	down	-inf	-inf	0.0451	2	0
mmu-mir-6236-p3_5	GAATCAACTAGCCCTGAAAA	up	3.09	1.63	0.0453	8	24
mmu-mir-6236-p3_3	AATGGATGGCGCTGGAGC	up	3.09	1.63	0.0453	8	24
mmu-mir-6236-p3_4	GAATCAACTAGCCCTGAA	up	3.09	1.63	0.0453	8	24
mmu-mir-6236-p3_2	AAATGGATGGCGCTGGAGC	up	3.09	1.63	0.0453	8	24
bta-miR-212	ACCTTGGCTCTAGACTGCTTACT	up	1.58	0.66	0.0457	25	40
mmu-mir-3968-p5_1ss12AT	AATCCCACTCCTGACACCAT	up	2.7	1.43	0.0458	7	20
PC-3p-15137_327	AGGCGAGCTCAGGGAGGAC	up	2.84	1.5	0.0458	33	94
oar-miR-376b-3p_R+1	ATCATAGAGGAAAATCCATGTT	down	0.17	-2.58	0.0459	13	2
oar-miR-541-5p	AAAGGATTCTGCTGTCGGTCCCACT	down	0.04	-4.51	0.0472	131	6
chi-miR-1271-5p_R+2	CTTGGCACCTAGTAAGTACTCA	down	0.44	-1.2	0.0477	430	188
oar-miR-191	CAACGGAATCCCAAAAGCAGCT	down	0.88	-0.18	0.0479	34534	30473
mmu-mir-6240-p5_1ss10AG	CGAAGGCCCGCGGCGGGT	up	1.93	0.95	0.048	62	120
bta-miR-2440_L+1R+3_1ss3GT	GTTCAGTGATGAGACCCTGGAATG	up	1.53	0.61	0.049	725	1106
bta-miR-378_R+1_1ss22CT	ACTGGACTTGGAGTCAGAAGGTT	down	0.8	-0.32	0.0495	2902	2317
oar-miR-485-5p	AGAGGCTGGCCGTGATGAATTCG	down	0.57	-0.82	0.0496	1397	790
bta-miR-4286_R+1	ACCCCACTCCTGGTACCA	up	1.46	0.54	0.05	453	659
