# Supplementary material for: The role of miR-369-3p in proliferation and differentiation of preadipocytes in Aohan fine-wool sheep
Source: Copernicus journal article supplement (doi:10.5194/aab-66-93-2023), 2023-02-27
Supplement: Supplementary file 2 [file Table S2 Primer sequences.xls]

## Sheet: Sheet1
Gene			Primer sequence（5'-3'）						Product length
PPARγ			F:CATTTCTGCTCCGCACTAC						234bp
			R:TGGAACCCTGACGCTTT
C/EBPα			F:TCCGTGGACAAGAACAGCAA						137bp
			R:TCATTGTCACTGGTCAGCTCC
CDK4			F:ACTTTGTGGCCCTCAAGAGT						215bp
			R:CCTGAGGTCTTGGTCCACAT
CyclinB			F:ATCGGTGACTTTGCCTTTGT						245bp
			R:CCTGCTGCAATCTGAGAAGG
GAPDH			F:GTCGGAGTGAACGGATTTGG						196bp
			R:CATTGATGACGAGCTTCCCG
U6			F:GGAACGATACAGAGAAGATTAGC						68bp
			R:TGGAACGCTTCACGAATTTGCG
miR-369-3p			F:GCAATAATACATGGTTGATCTTTA						18bp
			R:GTATCAACGCAGAGTACTTT
