# Supplementary material for: The role of miR-369-3p in proliferation and differentiation of preadipocytes in Aohan fine-wool sheep
Source: Copernicus journal article supplement (doi:10.5194/aab-66-93-2023), 2023-02-27
Supplement: Supplementary file [file aab-66-93-2023-supplement-title-page.pdf › aab-66-93-2023-supplement-title-page.pdf]

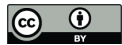

## *Supplement of*

# **The role of miR-369-3p in proliferation and differentiation of preadipocytes in Aohan fine-wool sheep**

**Shijie Xue et al.**

*Correspondence to:* Nan Liu (nanliu@sina.com) and Jianning He (hexingxing104@163.com)

- aab-66-93-2023-supplement-title-page.pdf
- Figure S1 The conservation of miR-369-3p was determined by comparing the seed sequences of different species..png
- Figure S2 Transfection effect of miR-369-3p mimic and inhibitor..png
- Table S1 Summary of differentially expressed miRNAs.xlsx
- Table S2 Primer sequences.xls
- The captions of the tables and figures.docx

The copyright of individual parts of the supplement might differ from the article licence.
