# Supplementary material for: The role of miR-369-3p in proliferation and differentiation of preadipocytes in Aohan fine-wool sheep
Source: Arch Anim Breed. 2023 Feb 27;66(1):93–102. doi: 10.5194/aab-66-93-2023 (PMC10294027; doi:10.5194/aab-66-93-2023)
Supplement: The supplement related to this article is available online at: https://doi.org/10.5194/aab-66-93-2023-supplement. [file aab-66-93-supplement.zip]

Archive with 6 entries (6 files):
- Table S2 Primer sequences.xls
- Figure S2 Transfection effect of miR-369-3p mimic and inhibitor..png
- The captions of the tables and figures.docx
- Figure S1 The conservation of miR‐369-3p was determined by comparing the seed sequences of different species..png
- aab-66-93-2023-supplement-title-page.pdf
- Table S1 Summary of differentially expressed miRNAs.xlsx
